# Supplementary material for: Achieving order of magnitude increases in CO2 reduction reaction efficiency by product separations and recycling
Source: Royal Society of Chemistry journal article supplement (doi:10.1039/d2se01156e), 2022-01-01
Supplement: d2se01156e1.pdf [file d2se01156e1.pdf]

## Supplementary Information

### **Achieving Order of Magnitude Increases in CO<sub>2</sub> Reduction Reaction Efficiency by Product Separations and Recycling**

Akriti Sarswat<sup>1</sup>, David S. Sholl<sup>1,2\*</sup>, and Ryan P. Lively<sup>1\*</sup>

<sup>1</sup>School of Chemical & Biomolecular Engineering, Georgia Institute of Technology, Atlanta, GA 30332-0100, USA

<sup>2</sup>Oak Ridge National Laboratory, Oak Ridge, TN 37830, USA

# Table of Contents

Details of Mass and Energy calculations of each unit operation have been described in detail for the following unit operations:

|                                                               |    |
|---------------------------------------------------------------|----|
| 1. Electrochemical Reactor                                    | 3  |
| 2. Flash tanks for effluent anodic and cathodic streams       | 4  |
| 3. Adsorbents – Zeolite CaX and MOF Ni <sub>2</sub> (m-dobdc) | 6  |
| 4. Membrane for production of Syn Gas                         | 10 |
| 5. Distillation columns                                       | 11 |
| 6. Combustion chamber                                         | 12 |
| 7. Flash tank post combustion                                 | 13 |
| 8. Carbon Footprint Analysis                                  | 13 |
| 9. References                                                 | 14 |

## Reactor

The cathodic efficiency and conversion is based on the work by Gabardo et al. [1] and Alerte et al. [2]. The reaction assumes 63% cathodic conversion and ~25.56% overall conversion of carbon dioxide. The composition has been slightly modified to include CH<sub>4</sub> and C<sub>2</sub>H<sub>6</sub>

**Table S1: Faradic efficiencies and corresponding mole fractions for the cathodic effluent stream**

| Product                          | Faradic Efficiency | Mole Fraction          |
|----------------------------------|--------------------|------------------------|
| C <sub>2</sub> H <sub>4</sub>    | 47                 | 0.13                   |
| CH <sub>4</sub>                  | 5                  | 0.02                   |
| CO                               | 16                 | 0.26                   |
| C <sub>2</sub> H <sub>6</sub>    | 1                  | 2.30 x10 <sup>-3</sup> |
| H <sub>2</sub>                   | 5                  | 0.08                   |
| C <sub>2</sub> H <sub>5</sub> OH | 17                 | 0.04                   |
| CH <sub>3</sub> COOH             | 7                  | 0.03                   |
| C <sub>3</sub> H <sub>7</sub> OH | 2                  | 3.60 x10 <sup>-3</sup> |
| CO <sub>2</sub>                  | --                 | 0.41                   |
| H <sub>2</sub> O                 | --                 | 0.03                   |

Anode compositions have been calculated assuming 100% Faradic Efficiency of Oxygen Evolution Reaction, 0.5 mol CO<sub>2</sub>/e<sup>-</sup> crossover and 100% RH. The mole fractions are listed in Table S2.

**Table S2: Mole fractions for the anodic effluent stream**

| Product          | Mole Fraction |
|------------------|---------------|
| CO <sub>2</sub>  | 0.65          |
| O <sub>2</sub>   | 0.32          |
| H <sub>2</sub> O | 0.03          |

All calculations have been reported for product composition and flow rates such that 1 kg-mol/time of ethylene as product is obtained. All temperatures and pressures are assumed to be 25 °C and 1 bar unless reported otherwise. Energy Calculations for the various unit operations was done using the ASPEN HYSYS software.

## Flash Tanks

The product streams from the cathode and anode are each fed to a separate flash tank.

### Flash tank 1

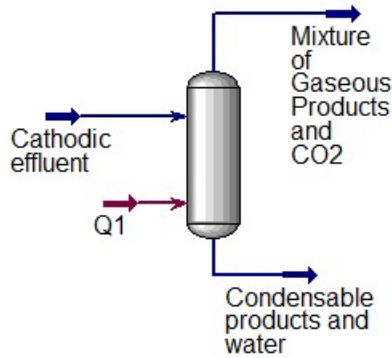

**Figure S1: Flash tank which separates effluent cathodic stream as modelled in ASPEN HYSYS**

Inlet stream: Product stream exiting cathode

Temperature at which flash tank is operated:  $-14.06\text{ }^{\circ}\text{C}$

**Energy Requirement:  $2.7860 \times 10^4$  kJ**

**Table S3 (a): Effluent Mole fractions: Vapor Stream (b) Liquid Stream**

(a)

|                                 | Mole Fraction        |
|---------------------------------|----------------------|
| $\text{C}_2\text{H}_4$          | 0.14                 |
| $\text{CH}_4$                   | 0.02                 |
| $\text{CO}$                     | 0.29                 |
| $\text{C}_2\text{H}_6$          | $2.6 \times 10^{-3}$ |
| $\text{H}_2$                    | 0.09                 |
| $\text{EtOH}$                   | $2.4 \times 10^{-3}$ |
| $\text{CH}_3\text{COOH}$        | $0.4 \times 10^{-3}$ |
| $\text{C}_3\text{H}_7\text{OH}$ | $0.1 \times 10^{-3}$ |
| $\text{CO}_2$                   | 0.45                 |
| $\text{H}_2\text{O}$            | $1.1 \times 10^{-3}$ |

(b)

|                                 | Mole Fraction |
|---------------------------------|---------------|
| $\text{EtOH}$                   | 0.41          |
| $\text{CH}_3\text{COOH}$        | 0.26          |
| $\text{C}_3\text{H}_7\text{OH}$ | 0.03          |
| $\text{H}_2\text{O}$            | 0.29          |

## Flash tank 2

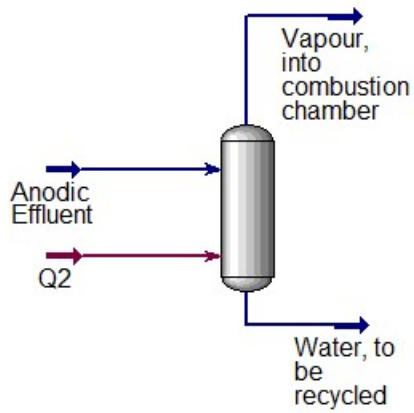

**Figure S2: Flash tank which separates effluent anodic stream as modelled in ASPEN HYSYS**

Inlet stream: Product stream exiting anode

Temperature at which flash tank is operated: 4.08 °C

**Energy Requirement:  $3.52 \times 10^4$  kJ**

**Table S4: Vapor stream mole fractions**

|                  | Mole Fraction        |
|------------------|----------------------|
| H <sub>2</sub> O | $8.2 \times 10^{-3}$ |
| O <sub>2</sub>   | 0.33                 |
| CO <sub>2</sub>  | 0.66                 |

## Adsorbents

The adsorbents for the purpose of this work were taken from the work of Bachman, J.E. et al. [3] We estimate selectivities and uptakes for our mixtures by fitting the single adsorption isotherms from the work of Bachman et al. [3] to Dual-Site Langmuir-Freundlich Isotherm equation (equation S1) and then employ the Ideal Adsorbed Solution Theory model[4]. The parameters for the isotherms for CaX and Ni<sub>2</sub>(m-dobdc) are given in Table S5 and S8 respectively.

$$n(P) = q1 * \frac{(k1 * P)^{n1}}{1 + (k1 * P)^{n1}} + q2 * \frac{(k2 * P)^{n2}}{1 + (k2 * P)^{n2}} \quad (S1)$$

where n is the uptake in mmol/g, P is pressure in mbar, q1, k1, n1, q2, k2 and n2 are constants

The heats of adsorption have been used as an estimate of energy requirements for regeneration of adsorbent. **Heats of adsorption provide minimum thermodynamic estimate of the process. Here, we assume the actual energy required to be 1.5 times this thermodynamic minimum.** The values for CaX and Ni<sub>2</sub>(m-dobdc) are used as reported by Bachman et al. [3] and are reported in Table S7 and S9 respectively.

## Zeolite CaX

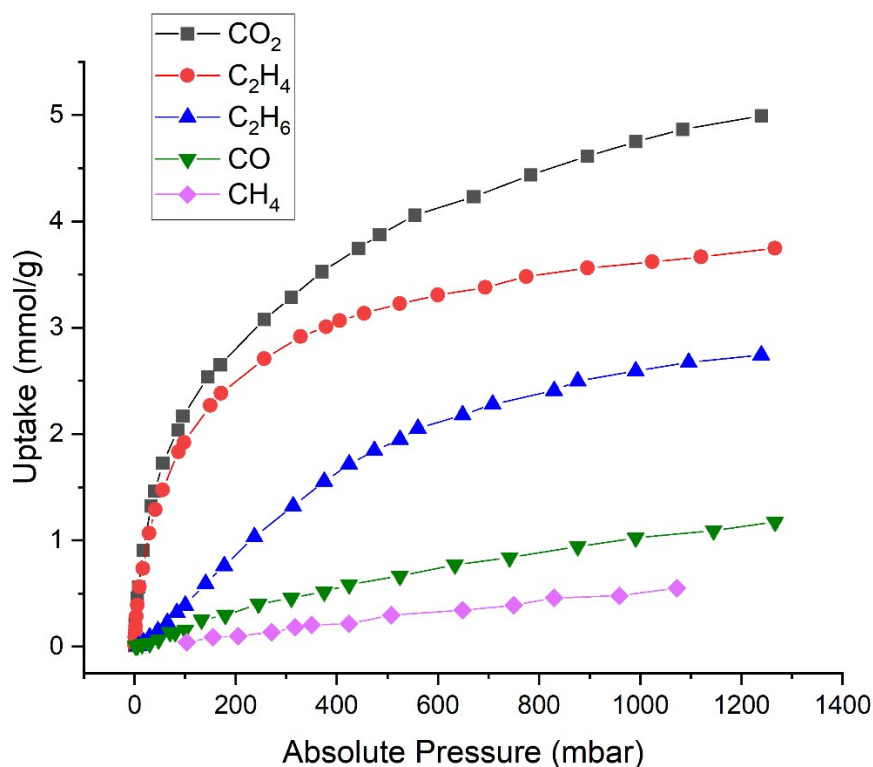

Figure S3: Isotherms of CO<sub>2</sub>, C<sub>2</sub>H<sub>4</sub>, C<sub>2</sub>H<sub>6</sub>, CO, CH<sub>4</sub> in Zeolite CaX at 25 °C [3]

**Table S5: Fitted parameters for Dual-Site Langmuir-Freundlich Isotherm equation for CaX**

| Constants                | Gases                 |                               |                               |                        |                        |
|--------------------------|-----------------------|-------------------------------|-------------------------------|------------------------|------------------------|
|                          | CO <sub>2</sub>       | C <sub>2</sub> H <sub>4</sub> | C <sub>2</sub> H <sub>6</sub> | CO                     | CH <sub>4</sub>        |
| q1 (mmol/g)              | 3.06                  | 4.36                          | 3.33                          | 7.09x10 <sup>-17</sup> | 1.59                   |
| k1 (mbar <sup>-1</sup> ) | 0.02                  | 7.6 x10 <sup>-3</sup>         | 2.4 x10 <sup>-3</sup>         | 4.5x10 <sup>-12</sup>  | 5.37x10 <sup>-4</sup>  |
| n1                       | 0.81                  | 0.76                          | 1.43                          | 8.18x10 <sup>-5</sup>  | 1.19                   |
| q2 (mmol/g)              | 3.27                  | 1.92x10 <sup>-14</sup>        | 7.2 x10 <sup>-3</sup>         | 2.25                   | 9.32x10 <sup>-9</sup>  |
| k2 (mbar <sup>-1</sup> ) | 1.4 x10 <sup>-3</sup> | 0.34                          | 9574.79                       | 0.8 x10 <sup>-3</sup>  | 2.66x10 <sup>-11</sup> |
| n2                       | 1.26                  | 2.41                          | 0.11                          | 1.00                   | 0.99                   |

Here we use 2 CaX beds for the effluent cathode mixture to separate CO<sub>2</sub> and C<sub>2</sub>H<sub>4</sub> totally remove any CO

IAST selectivities for CaX are calculated as  $\alpha_{A/B} = \frac{x_A/y_A}{x_B/y_B}$ , where  $x_i$  refers to adsorbed mole fraction and  $y_i$  refers to initial mixture mole fraction. Here, component A is CO<sub>2</sub> + C<sub>2</sub>H<sub>4</sub> and component B is CO + H<sub>2</sub> + CH<sub>4</sub> + C<sub>2</sub>H<sub>6</sub>. Selectivity for the 1<sup>st</sup> bed is ~44 and 2<sup>nd</sup> bed is ~16.

**Table S6: Mole Fractions (a) CO<sub>2</sub> and C<sub>2</sub>H<sub>4</sub> stream adsorbed by CaX beds (b) rejected mixture of gases after passing over CaX**

(a)

|                               | Mole Fraction |
|-------------------------------|---------------|
| CO <sub>2</sub>               | 0.24          |
| C <sub>2</sub> H <sub>4</sub> | 0.76          |

(b)

|                               | Mole Fraction         |
|-------------------------------|-----------------------|
| CH <sub>4</sub>               | 0.06                  |
| C <sub>2</sub> H <sub>6</sub> | 6.3 x10 <sup>-3</sup> |
| CO                            | 0.71                  |
| H <sub>2</sub>                | 0.22                  |

**Table S7: Heats of adsorption (kJ/mol) for gases for zeolite CaX [3]**

|                               | Heat of ad. (kJ/mol) |
|-------------------------------|----------------------|
| C <sub>2</sub> H <sub>4</sub> | 48.29                |
| CH <sub>4</sub>               | 35.10                |
| C <sub>2</sub> H <sub>6</sub> | 35.16                |
| CO                            | 28.32                |
| CO <sub>2</sub>               | 54.94                |

**Total Energy Requirement: 1.5\*(4.533x10<sup>5</sup> kJ) = 6.800x10<sup>5</sup> kJ**

## Metal Organic Framework Ni<sub>2</sub>(m-dobdc)

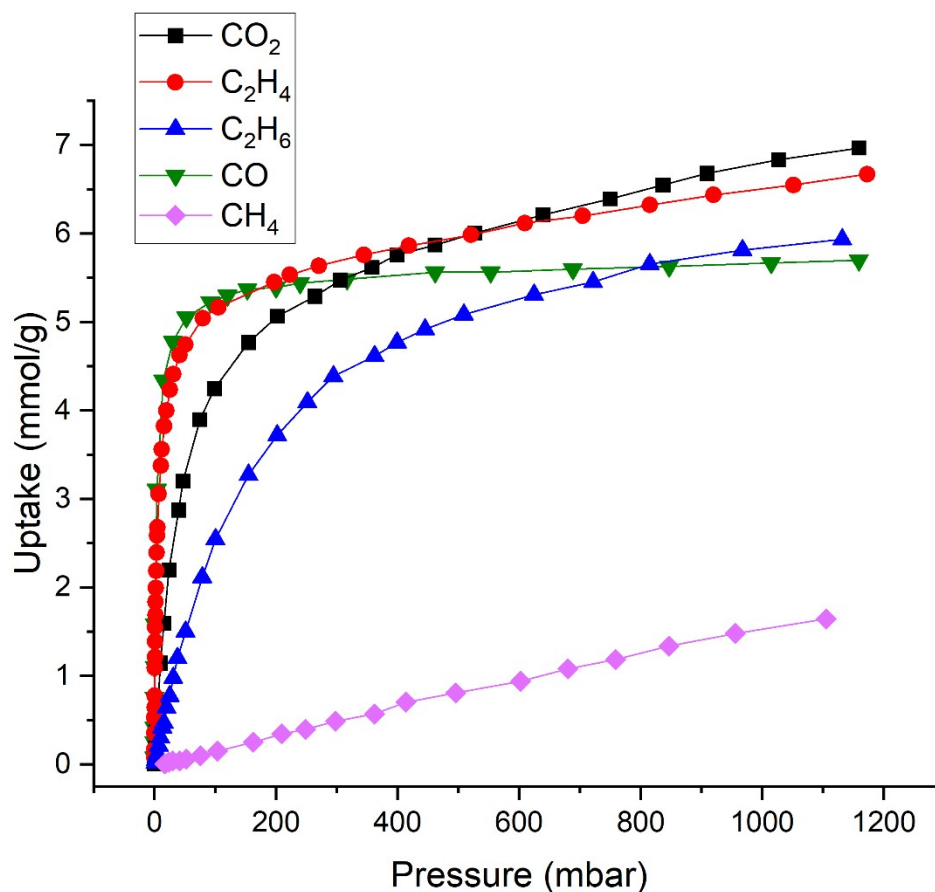

Figure S4: Isotherms of CO<sub>2</sub>, C<sub>2</sub>H<sub>4</sub>, C<sub>2</sub>H<sub>6</sub>, CO, CH<sub>4</sub> in Ni<sub>2</sub>(m-dobdc) at 25 °C [3]

Table S8: Fitted parameters for Dual-Site Langmuir-Freundlich Isotherm equation for Ni<sub>2</sub>(m-dobdc)

| Constants                | Gases                 |                               |
|--------------------------|-----------------------|-------------------------------|
|                          | CO <sub>2</sub>       | C <sub>2</sub> H <sub>4</sub> |
| q1 (mmol/g)              | 3.09                  | 4.55                          |
| k1 (mbar <sup>-1</sup> ) | 7.24x10 <sup>-4</sup> | 0.27                          |
| n1                       | 1.56                  | 0.86                          |
| q2 (mmol/g)              | 5.81                  | 3.58                          |
| k2 (mbar <sup>-1</sup> ) | 0.03                  | 1.3 x10 <sup>-3</sup>         |
| n2                       | 1.04                  | 0.64                          |

We used 3 beds of Ni<sub>2</sub>(m-dobdc) to obtain > 95% purity based on IAST calculations. As mentioned in the paper, materials with greater selectivity need to be developed here.



**Table S9: Heats of adsorption (kJ/mol) for gases for MOF Ni<sub>2</sub>(m-dobdc) [3]**

|                               | Heat of ad. (kJ/mol) |
|-------------------------------|----------------------|
| C <sub>2</sub> H <sub>4</sub> | 52.27                |
| CO <sub>2</sub>               | 37.89                |

**Table S10: Adsorbed phase mole fraction for the suggested 3 beds of Ni<sub>2</sub>(m-dobdc) based on IAST**

|                                   | Effluent stream from CaX | Bed 1 | Bed 2 | Bed 3 |
|-----------------------------------|--------------------------|-------|-------|-------|
| <b>C<sub>2</sub>H<sub>4</sub></b> | 0.24                     | 0.59  | 0.85  | 0.96  |
| <b>CO<sub>2</sub></b>             | 0.76                     | 0.41  | 0.15  | 0.04  |

**Total Energy Requirement:  $1.5 \times (1.918 \times 10^5 \text{ kJ}) = 2.877 \times 10^5 \text{ kJ}$**

## Membrane

Here the calculations are based on a cellulose acetate (CA) membrane [5] to produce Syn Gas. The upstream of the membrane is at 30 bar and 35 °C.

Separation factor for component A relative to component B,  $\beta_{A/B}$  can be defined by equation S2

$$\beta_{A/B} = \frac{\left(\frac{y_A}{y_B}\right)}{\left(\frac{x_A}{x_B}\right)} \quad (S2)$$

Where  $y_i$  and  $x_i$  are gas phase compositions of downstream and upstream of the membrane respectively.

The separation factors for this membrane are given in Table S11. Since ethane and methane are very dilute in the upstream, perfect separation is assumed.

**Table S11: Separation factor for CA membrane**

|                                 | Separation Factor |
|---------------------------------|-------------------|
| H <sub>2</sub> /CO              | 21                |
| H <sub>2</sub> /CH <sub>4</sub> | 26                |

### **Total energy required (for compressor and cooler): 1.1x10<sup>5</sup> kJ**

We obtain Syngas with H<sub>2</sub>/CO ratio of ~ 6.5. Note that this ratio depends on the membrane used and can be varied as required by using a different membrane or operating at different temperatures and pressure ratios.

The retentate is later combusted.

## Distillation Columns

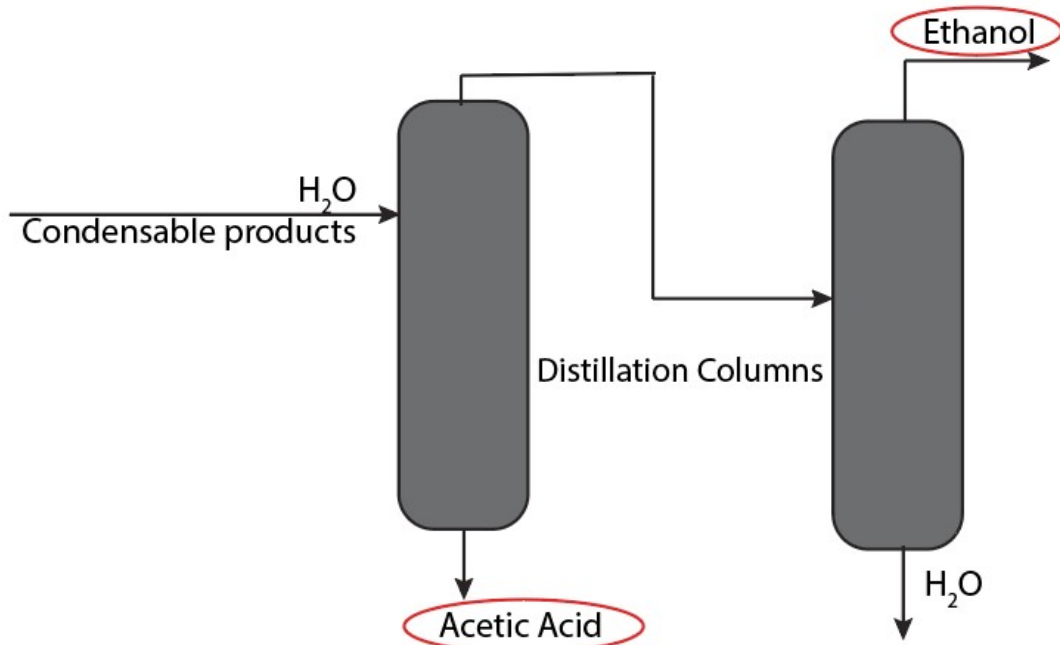

**Figure S5: Separation of aqueous mixture of condensable products using distillation. Products are encircled in red**

We use 2 columns to obtain acetic acid of greater than 99% purity and an azeotrope of ethanol and water. (~90% alcohol).

Fluid Package used: NRTL-ideal

**Table S12: Column design specifications**

|                                                                              | Column 1 | Column 2 |
|------------------------------------------------------------------------------|----------|----------|
| Number of trays                                                              | 15       | 100      |
| Reflux Ratio                                                                 | 2        | 6.28     |
| Distillate amount per kg-mol C <sub>2</sub> H <sub>4</sub> produced (kg-mol) | 0.62     | 0.32     |
| Bottoms Product per kg-mol C <sub>2</sub> H <sub>4</sub> produced (kg-mol)   | 0.22     | 0.30     |

**Total energy requirement:  $3.34 \times 10^5$  kJ**

## Combustion Chamber

**Table S13: Heats of Combustion at 25 °C and 1 bar**

|                               | Heat of Combustion (kJ/mol) | Reference |
|-------------------------------|-----------------------------|-----------|
| CO                            | -282.38*                    | [6]       |
| CH <sub>4</sub>               | -890.71                     | [7]       |
| C <sub>2</sub> H <sub>6</sub> | -1560.69                    | [7]       |

\*Corrected to 25 °C

We add 2.52 kg-mol Methane (per kg mol ethylene produced) to consume all oxygen in the combustion chamber

**Table S14: Final composition of the fuel in combustion chamber (per kg mol ethylene produced)**

|                               | Amount (kg-mols) | Mole Fraction         |
|-------------------------------|------------------|-----------------------|
| CO                            | 1.94             | 0.08                  |
| CH <sub>4</sub>               | 2.68             | 0.11                  |
| C <sub>2</sub> H <sub>6</sub> | 0.01             | 0.6 x10 <sup>-3</sup> |
| O <sub>2</sub>                | 6.38             | 0.27                  |
| CO <sub>2</sub>               | 12.77            | 0.53                  |
| H <sub>2</sub> O              | 0.16             | 6.6 x10 <sup>-3</sup> |

**Total energy produced: 2.95x10<sup>6</sup> kJ**

Adiabatic flame temperature of this mixture is 2244 °C

### Flash tank 3

Inlet stream: Effluent mixture of CO<sub>2</sub> and H<sub>2</sub>O from the combustion chamber

Temperature at which flash tank is operated: 3.6 °C

**Energy Requirement: 1.75x10<sup>4</sup> kJ**

### Carbon Footprint Analysis

DAC carbon footprint: 16 g eq. CO<sub>2</sub>/ kg captured [8]

CH<sub>4</sub> supply chain emissions: 10.5 g eq./ MJ HHV ( = 582.75 g eq./kg CH<sub>4</sub> delivered) [9]

Overall footprint associated with ethylene production is given by

$$\frac{-CO_{2consumed} + CO_{2DAC\ footprint} + CO_{2CH_4\ supply\ chain\ footprint}}{m_{C_2H_4}} = -0.46 \text{ g eq. CO}_2/\text{g C}_2\text{H}_4$$

produced

## References:

1. Gabardo, C.M., et al., *Continuous Carbon Dioxide Electroreduction to Concentrated Multi-carbon Products Using a Membrane Electrode Assembly*. *Joule*, 2019. **3**(11): p. 2777-2791.
2. Alerte, T., et al., *Downstream of the CO<sub>2</sub> Electrolyzer: Assessing the Energy Intensity of Product Separation*. *ACS Energy Letters*, 2021. **6**(12): p. 4405-4412.
3. Bachman, J.E., et al., *Enabling alternative ethylene production through its selective adsorption in the metal-organic framework Mn<sub>2</sub>(m-dobdc)*. *Energy & Environmental Science*, 2018. **11**(9): p. 2423-2431.
4. Myers, A.L. and J.M. Prausnitz, *Thermodynamics of mixed-gas adsorption*. *AIChE Journal*, 1965. **11**(1): p. 121-127.
5. Perry, J.D., K. Nagai, and W.J. Koros, *Polymer Membranes for Hydrogen Separations*. *MRS Bulletin*, 2006. **31**(10): p. 745-749.
6. Awbery, J.H. and E. Griffiths, *The heats of combustion of carbon monoxide in oxygen and of nitrous oxide in carbon monoxide at constant pressure*. *Proceedings of the Royal Society of London. Series A, Containing Papers of a Mathematical and Physical Character*, 1933. **141**(843): p. 1-16.
7. Pittam, D.A. and G. Pilcher, *Measurements of heats of combustion by flame calorimetry. Part 8. — Methane, ethane, propane, n-butane and 2-methylpropane*. *Journal of the Chemical Society, Faraday Transactions 1: Physical Chemistry in Condensed Phases*, 1972. **68**(0): p. 2224-2229.
8. Terlouw, T., et al., *Life Cycle Assessment of Direct Air Carbon Capture and Storage with Low-Carbon Energy Sources*. *Environmental Science & Technology*, 2021. **55**(16): p. 11397-11411.
9. Balcombe, P., et al., *The Natural Gas Supply Chain: The Importance of Methane and Carbon Dioxide Emissions*. *ACS Sustainable Chemistry & Engineering*, 2017. **5**(1): p. 3-20.
